# Supplementary material for: Flexible Substrate of Cellulose Fiber/Structured Plasmonic Silver Nanoparticles Applied for Label-Free SERS Detection of Malathion
Source: MDPI journal article supplement (doi:10.3390/ma16041475), 2023-02-09
Supplement: s1 [file s1]

# Supplementary Materials

## Flexible Substrate of Cellulose Fiber/Structured Plasmonic Silver Nanoparticles Applied for Label-Free SERS Detection of Malathion

Kseniya V. Serebrennikova <sup>1</sup>, Nadezhda S. Komova <sup>1</sup>, Arseniy V. Aybush <sup>2</sup>, Anatoly V. Zherdev <sup>1</sup> and Boris B. Dzantiev <sup>1,\*</sup>

<sup>1</sup> A.N. Bach Institute of Biochemistry, Research Center of Biotechnology, Russian Academy of Sciences, Leninsky prospect 33, 119071 Moscow, Russia

<sup>2</sup> N.N. Semenov Federal Research Center for Chemical Physics, Russian Academy of Sciences, Kosygin Street 4, 119991 Moscow, Russia

\* Correspondence: dzantiev@inbi.ras.ru

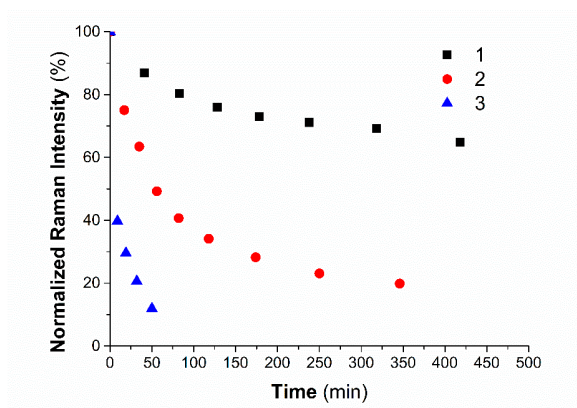

**Figure S1.** Normalized Raman Intensity at  $1068\text{ cm}^{-1}$  versus excitation time using 10 mW (1), 25 mW (2) and 50 mW (3) laser power.

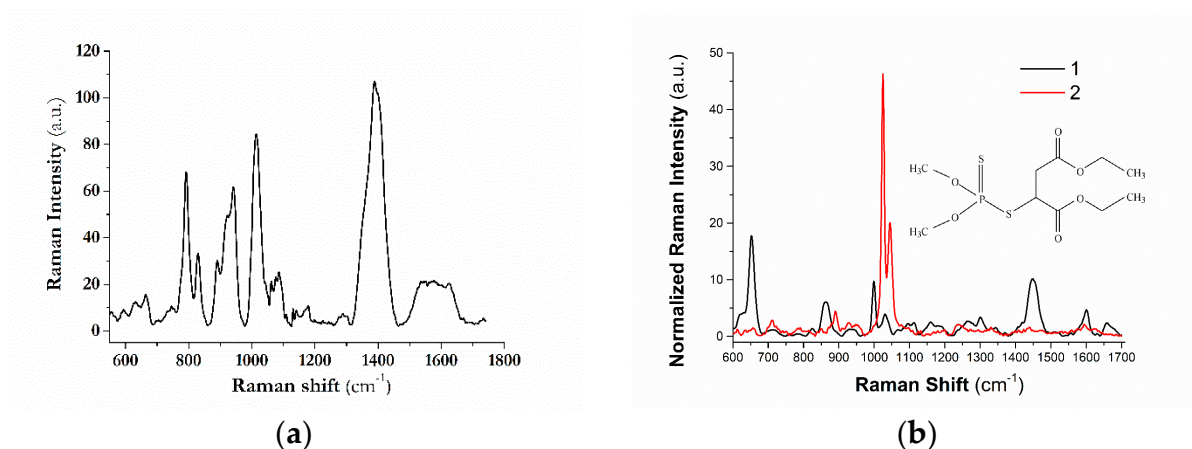

**Figure S2.** (a) Raman spectrum of blank rAgNS/AgNS-CF substrate. (b) Raman spectrum of 1g/L malathion, measured on a Raman Grade  $\text{CaF}_2$  window (1). Raman spectrum of 1 mg/L malathion, measured on the rAgNS/AgNS-CF substrate (2). Insert: the structure of malathion.
